# Supplementary material for: Facile and scalable fabrication of exosome-mimicking nanovesicles through PEGylated lipid detergent-aided cell extrusion
Source: Royal Society of Chemistry journal article supplement (doi:10.1039/d2nr04272j), 2022-01-01
Supplement: d2nr04272j1.pdf [file d2nr04272j1.pdf]

Electronic Supporting Information

## Facile and scalable fabrication of exosome-mimicking nanovesicles through PEGylated lipid detergent-aided cell extrusion

Jeong Yi Kang <sup>a</sup>, Bo Kyeong Yoon <sup>c</sup>, Hwira Baek <sup>a</sup>, Yuri Ko <sup>a</sup>, Suk Ho Bhang <sup>a</sup>, Joshua A. Jackman <sup>b,\*</sup>, Jin Woong Kim <sup>a,\*</sup>

<sup>a</sup> School of Chemical Engineering, Sungkyunkwan University, Suwon 16149, Republic of Korea.

<sup>b</sup> School of Chemical Engineering and Translational Nanobioscience Research Center, Sungkyunkwan University, Suwon 16419, Republic of Korea.

<sup>c</sup> School of Healthcare and Biomedical Engineering, Chonnam National University, Yeosu 59626, Republic of Korea

\*Corresponding Author

Prof. Joshua A. Jackman; Tel: +82 31 290 7243; E-mail: jjackman@skku.edu

Prof. Jin Woong Kim; Tel: +82 31 290 7346; E-mail: jinwoongkim@skku.edu

### Supplementary information

*Cytotoxicity measurements:* Cell viability was measured using an EZ-Cytox kit (EZ-3000, Dogen, Korea). Human HaCaT cells were dispersed in 100  $\mu$ L of Dulbecco's modified Eagle medium (DMEM) (4 mM of L-glutamine, 4500 mg/mL of glucose, 90% sodium pyruvate, 10% heat-inactivated fetal bovine serum, and 1% penicillin–streptomycin) in a 96-well plate. HaCaT cells were then incubated overnight at 37 °C under 5% CO<sub>2</sub> in an incubator. After removing the cell media, the exosome-mimicking nanovesicles (ENVs) were added to each well at different compound concentrations. Then, 100  $\mu$ L of EZ-Cytox and the DMEM mixture were added to the wells. The plate was incubated for an additional 24 h, and the absorbance was measured at 450 nm using a microplate reader (Spark, Tecan, Switzerland).

## Supplementary data

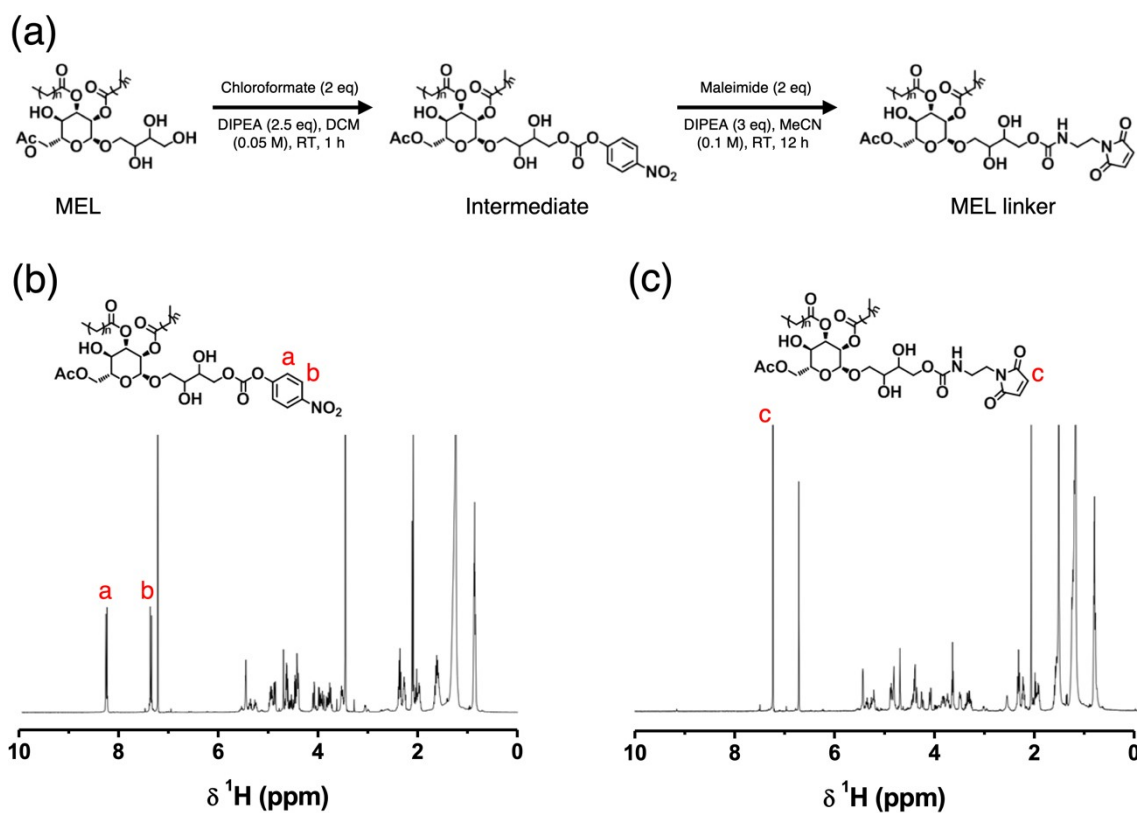

**Fig. S1** (a) Synthesis of a mannosylerythritol lipid (MEL)-based polyethylene glycol (PEG) linker.  $^1\text{H}$  NMR spectra (b) before and (c) after incorporation of maleimide linker to MEL.

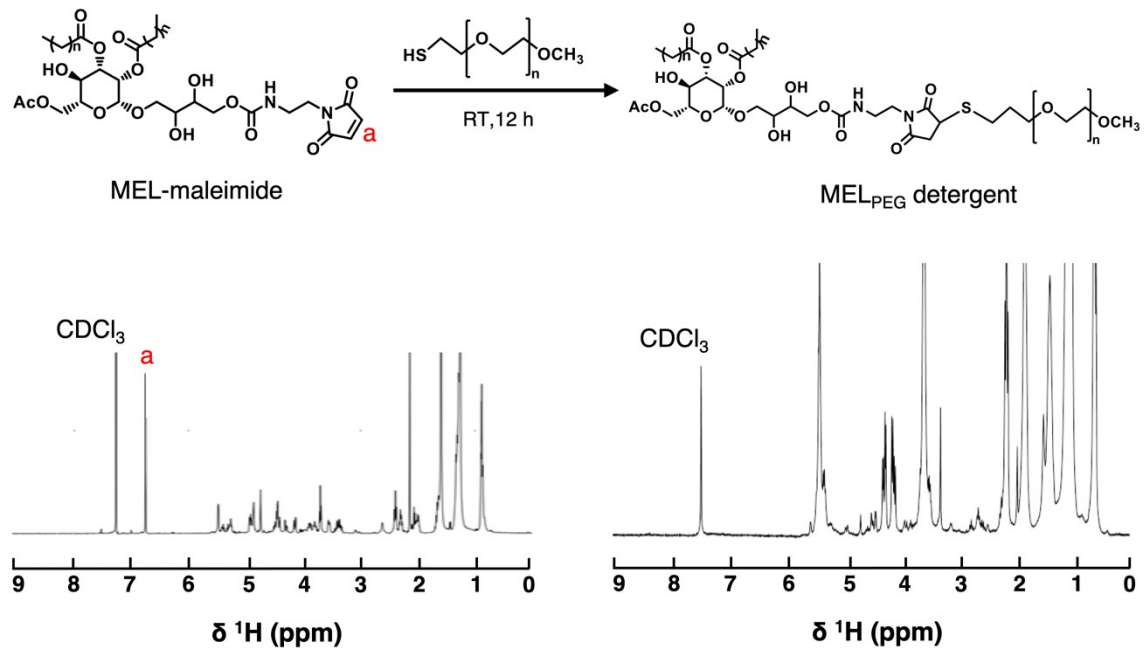

**Fig. S2** Chemical structure and analysis of  $^1\text{H}$  NMR spectra of (a) MEL linker and (b) MEL<sub>PEG112</sub>. The NMR solvent system was conditioned with the mixture of dimethylsulfoxide (DMSO) and  $\text{D}_2\text{O}$  at a ratio of 5:3 (v/v).

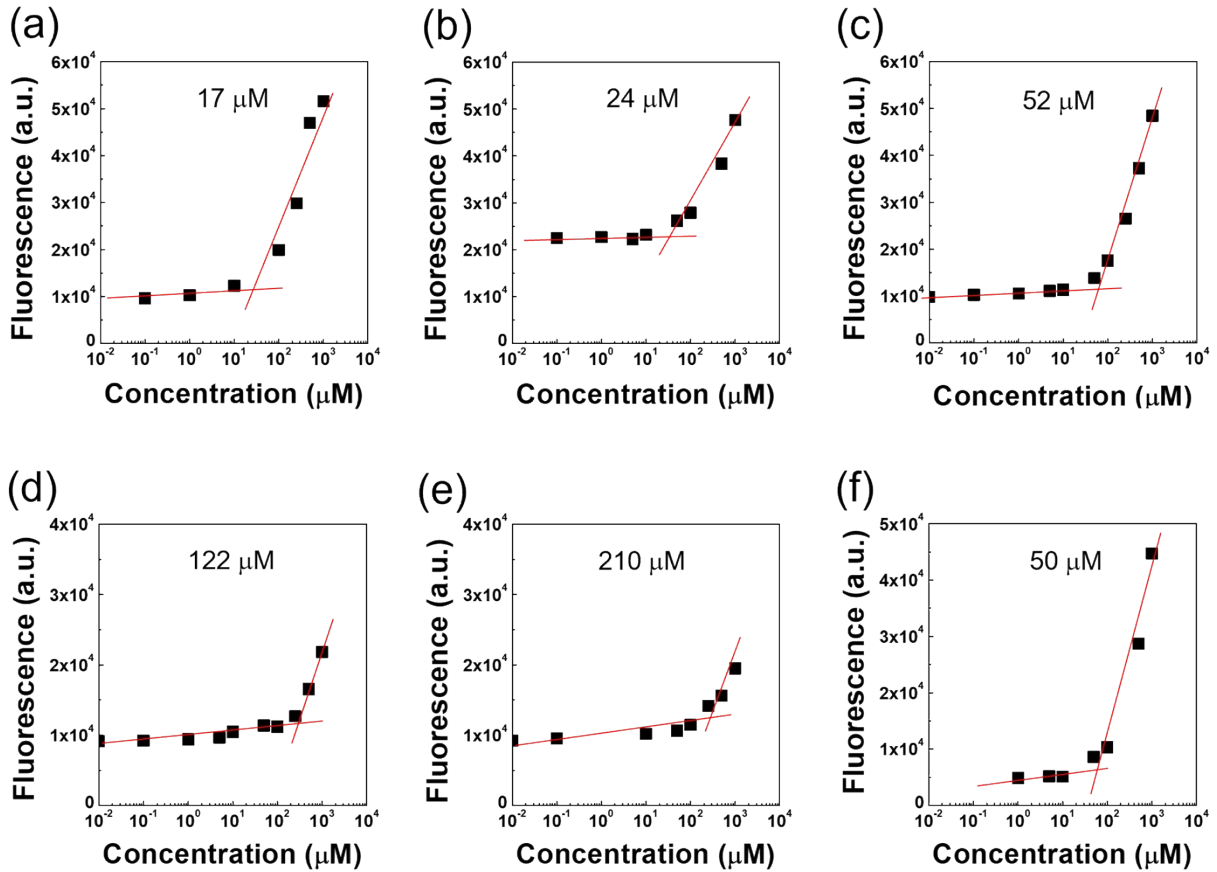

**Fig. S3** Determination of critical micelle concentration (CMC) in water for (a) Tween 80, (b) MEL, (c) MEL<sub>PEG28</sub>, (d) MEL<sub>PEG56</sub>, and (e) MEL<sub>PEG112</sub>, and in Tris buffer for (f) MEL<sub>PEG112</sub>.

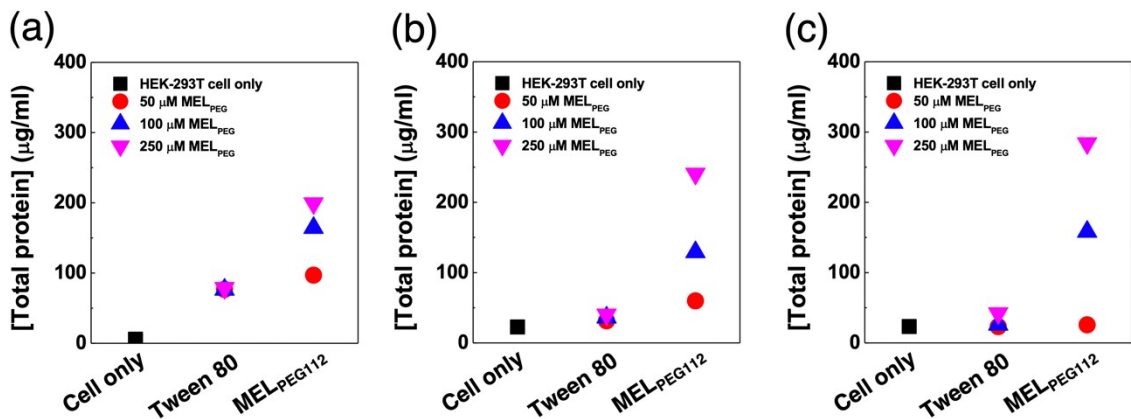

**Fig. S4** Total protein concentration of ENVs derived from HEK-293T at different cell densities: (a) 50,000 cells/mL, (b) 100,000 cells/mL, and (c) 250,000 cells/mL.

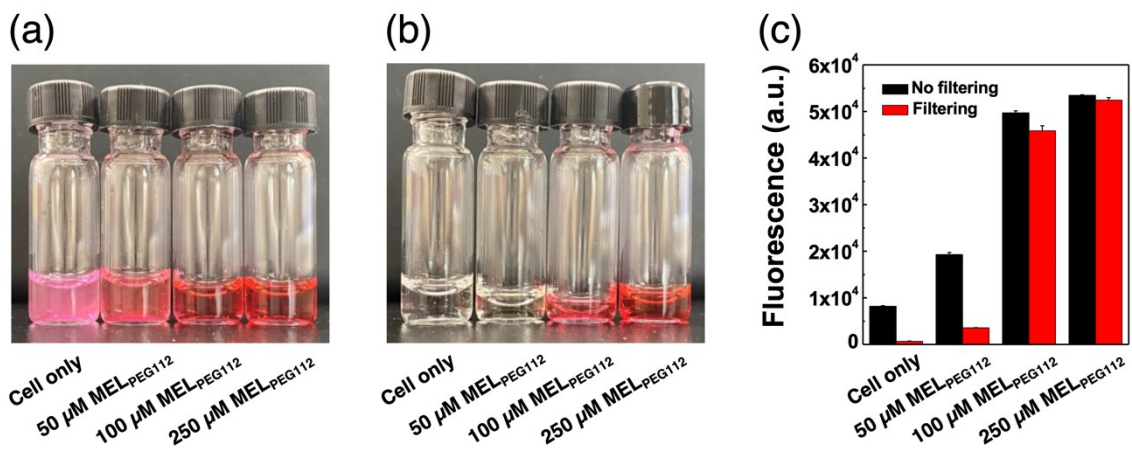

**Fig. S5** Cy3-conjugated ENVs with different concentrations of MEL-PEG112 (a) before and (b) after syringe filtration. (c) Fluorescence intensity of ENVs before and after syringe filtration.
