# Supplementary material for: Facile and scalable fabrication of exosome-mimicking nanovesicles through PEGylated lipid detergent-aided cell extrusion
Source: Royal Society of Chemistry journal article supplement (doi:10.1039/d2nr04272j), 2022-01-01

Electronic Supporting Information

## Facile and scalable fabrication of exosome-mimicking nanovesicles through PEGylated lipid detergent-aided cell extrusion

Jeong Yi Kang<sup>a</sup>, Bo Kyeong Yoon<sup>c</sup>, Hwira Baek<sup>a</sup>, Yuri Ko<sup>a</sup>, Suk Ho Bhang<sup>a</sup>, Joshua A. Jackman<sup>b, \*</sup>, Jin Woong Kim<sup>a, \*</sup>

<sup>a</sup> School of Chemical Engineering, Sungkyunkwan University, Suwon 16149, Republic of Korea.

<sup>b</sup> School of Chemical Engineering and Translational Nanobioscience Research Center, Sungkyunkwan University, Suwon 16419, Republic of Korea.

<sup>c</sup> School of Healthcare and Biomedical Engineering, Chonnam National University, Yeosu 59626, Republic of Korea

\*Corresponding Author

Prof. Joshua A. Jackman; Tel: +82 31 290 7243; E-mail: [jjackman@skku.edu](mailto:jjackman@skku.edu)

Prof. Jin Woong Kim; Tel: +82 31 290 7346; E-mail: [jinwoongkim@skku.edu](mailto:jinwoongkim@skku.edu)

## Supplementary data

Figure 3 (h).

CD9

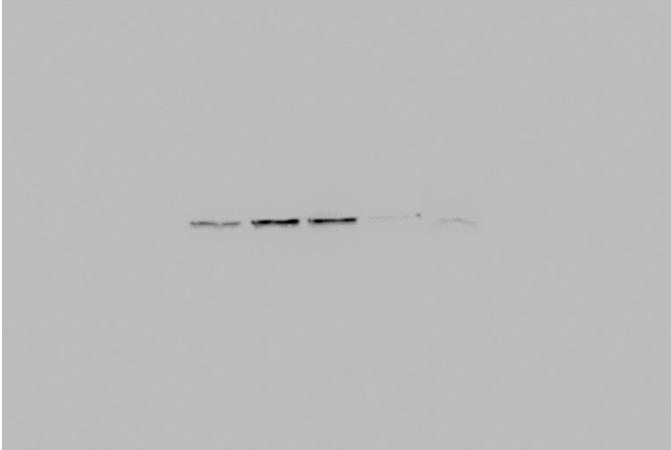

Alix

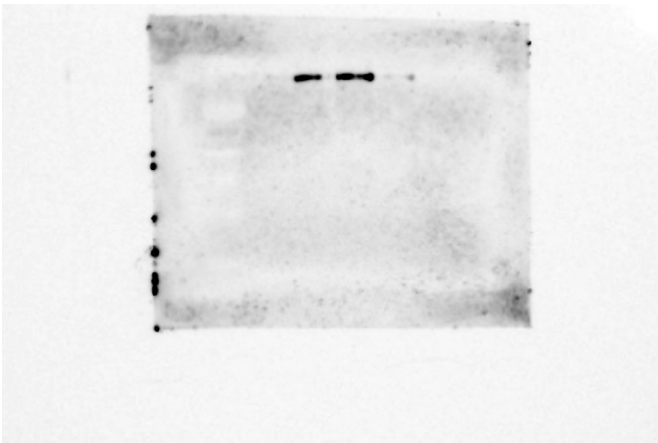

GAPDH

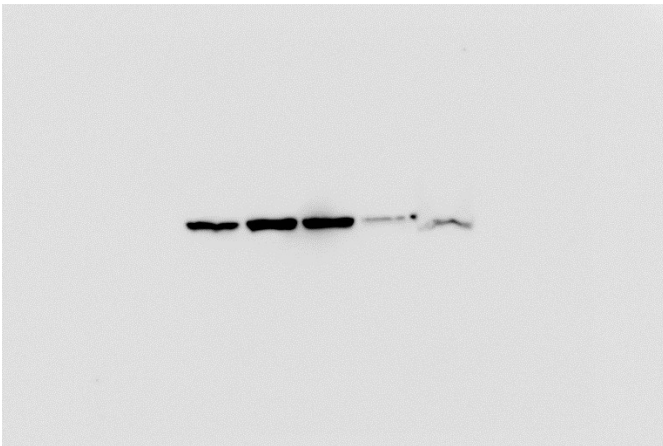

Supplement: d2nr04272j2.pdf [file d2nr04272j2.pdf]
